# Supplementary material for: Microwave-Assisted Extraction Coupled to HPLC-UV Combined with Chemometrics for the Determination of Bioactive Compounds in Pistachio Nuts and the Guarantee of Quality and Authenticity
Source: MDPI journal article supplement (doi:10.3390/molecules27041435), 2022-02-21
Supplement: s1 [file s1]

## Supplementary Material

### Microwave-Assisted Extraction Coupled to HPLC-UV Combined with Chemometrics for the Determination of Bioactive Compounds in Pistachio nuts and the Guarantee of Quality and Authenticity

Natasa P. Kalogiouri, Petros Mitsikaris, Athanasios N. Papadopoulos and Victoria F. Samanidou

**Table S1.** Analytical parameters of the MAE-HPLC-UV method for the determination of phenolics

| Compound            | Calibration equation | Linear range (µg/g) | r <sup>2</sup> | LOD (µg/g) | LOQ (µg/g) |
|---------------------|----------------------|---------------------|----------------|------------|------------|
| catechin            | $y = 20.04x + 5.88$  | 2 - 20              | 0.995          | 0.40       | 1.20       |
| diosmin             | $y = 14.05x - 0.48$  | 2 - 20              | 0.994          | 0.60       | 1.80       |
| epicatechin         | $y = 18.94x + 3.55$  | 2 - 20              | 0.994          | 0.40       | 1.20       |
| epigallocatechin    | $y = 64.25x - 5.32$  | 2 - 20              | 0.997          | 0.50       | 1.50       |
| gallic acid         | $y = 36.34x + 0.33$  | 0.5 - 20            | 0.995          | 0.07       | 0.20       |
| luteolin            | $y = 38.44x + 1.08$  | 2 - 20              | 0.996          | 0.50       | 1.50       |
| rosmarinic acid     | $y = 64.34x + 0.56$  | 0.5 - 20            | 0.994          | 0.10       | 0.30       |
| sinapic acid        | $y = 26.34x + 1.88$  | 1 - 20              | 0.996          | 0.30       | 0.90       |
| syringaldehyde      | $y = 34.75x - 4.22$  | 1 - 20              | 0.993          | 0.30       | 0.90       |
| syringic acid       | $y = 41.87x - 1.55$  | 0.5 - 20            | 0.995          | 0.10       | 0.30       |
| trans-cinnamic acid | $y = 67.35x + 3.45$  | 1 - 20              | 0.997          | 0.10       | 0.30       |
| vanillic acid       | $y = 68.78x + 4.14$  | 1 - 20              | 0.996          | 0.30       | 0.90       |
| vanillin            | $y = 20.47x + 3.75$  | 0.5 - 20            | 0.991          | 0.10       | 0.30       |

LOD: limit of detection, LOQ: limit of quantitation

**Table S2.** Intra-day recoveries and repeatability results of the MAE-HPLC-UV for the determination of phenolics

| <b>Compound</b>        | <b>Low<br/>Concentration<br/>(%R, n = 6)</b> | <b>%RSD</b> | <b>Medium<br/>Concentration<br/>(%R, n = 6)</b> | <b>%RSD</b> | <b>High<br/>Concentration<br/>(%R, n = 6)</b> | <b>%RSD</b> |
|------------------------|----------------------------------------------|-------------|-------------------------------------------------|-------------|-----------------------------------------------|-------------|
| catechin               | 91.2                                         | 3.9         | 96.2                                            | 3.8         | 95.3                                          | 2.2         |
| diosmin                | 90.5                                         | 3.6         | 91.5                                            | 4.2         | 94.4                                          | 1.8         |
| epicatechin            | 86.7                                         | 5.2         | 89.8                                            | 3.8         | 92.8                                          | 2.4         |
| epigallocatechin       | 91.1                                         | 4.4         | 92.2                                            | 3.9         | 89.7                                          | 5.1         |
| gallic acid            | 89.4                                         | 3.9         | 88.9                                            | 5.7         | 90.5                                          | 3.9         |
| luteolin               | 91.7                                         | 4.1         | 85.2                                            | 5.3         | 91.6                                          | 3.3         |
| rosmarinic acid        | 88.8                                         | 2.8         | 91.4                                            | 5.4         | 92.7                                          | 4.8         |
| sinapic acid           | 86.2                                         | 5.8         | 93.3                                            | 3.9         | 94.5                                          | 2.2         |
| syringaldehyde         | 88.5                                         | 3.5         | 92.4                                            | 2.9         | 89.8                                          | 4.1         |
| syringic acid          | 91.5                                         | 2.2         | 89.5                                            | 4.4         | 95.3                                          | 5.3         |
| trans-cinnamic<br>acid | 83.2                                         | 4.1         | 85.2                                            | 3.9         | 92.2                                          | 2.5         |
| vanillic acid          | 84.7                                         | 3.8         | 90.8                                            | 5.1         | 94.5                                          | 5.5         |
| vanillin               | 92.8                                         | 4.8         | 91.1                                            | 4.7         | 93.2                                          | 4.5         |

**Table S3.** Inter-day recoveries (%R) and reproducibility results of the MAE-HPLC-UV for the determination of phenolics

| Compound               | Low<br>Concentration<br>(%R, n = 3 x 3) | %RSD | Medium<br>Concentration<br>(%R, n = 3 x 3) | %RSD | High<br>Concentration<br>(%R, n = 3 x 3) | %RSD |
|------------------------|-----------------------------------------|------|--------------------------------------------|------|------------------------------------------|------|
| catechin               | 89.3                                    | 3.9  | 91.8                                       | 7.4  | 91.5                                     | 4.8  |
| diosmin                | 82.4                                    | 7.5  | 91.7                                       | 7.9  | 90.8                                     | 7.3  |
| epicatechin            | 85.2                                    | 6.5  | 92.8                                       | 6.5  | 93.1                                     | 6.2  |
| epigallocatechin       | 82.7                                    | 6.2  | 94.5                                       | 5.8  | 89.4                                     | 7.1  |
| gallic acid            | 89.8                                    | 8.4  | 91.9                                       | 7.4  | 93.8                                     | 5.4  |
| luteolin               | 91.4                                    | 8.1  | 92.8                                       | 8.8  | 94.8                                     | 3.2  |
| rosmarinic acid        | 93.6                                    | 6.1  | 95.9                                       | 4.2  | 93.1                                     | 5.2  |
| sinapic acid           | 92.2                                    | 5.4  | 92.7                                       | 4.7  | 92.8                                     | 4.4  |
| syringaldehyde         | 89.5                                    | 5.5  | 93.5                                       | 8.1  | 93.3                                     | 6.1  |
| syringic acid          | 91.9                                    | 8.3  | 92.9                                       | 6.3  | 91.9                                     | 5.6  |
| trans-cinnamic<br>acid | 94.5                                    | 7.9  | 89.9                                       | 7.9  | 93.7                                     | 6.2  |
| vanillic acid          | 94.4                                    | 8.4  | 93.8                                       | 9.4  | 91.2                                     | 7.9  |
| vanillin               | 92.2                                    | 6.7  | 91.7                                       | 6.9  | 93.3                                     | 8.3  |

**Table S4.** Analytical parameters of the MAE-HPLC-UV for the determination of tocopherols

| Compound                          | Calibration<br>equation | Linear<br>range<br>( $\mu\text{g/g}$ ) | $r^2$ | LOD<br>( $\mu\text{g/g}$ ) | LOQ<br>( $\mu\text{g/g}$ ) |
|-----------------------------------|-------------------------|----------------------------------------|-------|----------------------------|----------------------------|
| $\alpha$ -tocopherol              | $y = 6.21x - 1.33$      | 5 – 50                                 | 0.997 | 0.30                       | 0.90                       |
| ( $\beta$ + $\gamma$ )-tocopherol | $y = 7.48x + 0.16$      | 5 – 50                                 | 0.995 | 0.10                       | 0.30                       |
| $\delta$ -tocopherol              | $y = 6.06x + 0.49$      | 5 – 50                                 | 0.998 | 0.20                       | 0.60                       |

LOD: limit of detection, LOQ: limit of quantitation

**Table S5.** Inter-day recoveries and repeatability results of the MAE-HPLC-UV method for the determination of tocopherols

| <b>Compound</b>                   | <b>Low<br/>Concentration<br/>(%R, n = 6)</b> | <b>%RSD</b> | <b>Medium<br/>Concentration<br/>(%R, n = 6)</b> | <b>%RSD</b> | <b>High<br/>Concentration<br/>(%R, n = 6)</b> | <b>%RSD</b> |
|-----------------------------------|----------------------------------------------|-------------|-------------------------------------------------|-------------|-----------------------------------------------|-------------|
| $\alpha$ -tocopherol              | 93.1                                         | 2.7         | 95.1                                            | 3.6         | 96.8                                          | 4.7         |
| ( $\beta$ + $\gamma$ )-tocopherol | 95.7                                         | 3.6         | 96.6                                            | 4.4         | 95.9                                          | 5.3         |
| $\delta$ -tocopherol              | 96.8                                         | 5.2         | 96.6                                            | 4.3         | 94.9                                          | 4.2         |

**Table S6.** Inter-day recoveries (%R) and reproducibility results of the MAE-HPLC-UV for the determination of tocopherols

| <b>Compound</b>                   | <b>Low<br/>Concentration<br/>(%R, n = 3 x 3)</b> | <b>%RSD</b> | <b>Medium<br/>Concentration<br/>(%R, n = 3 x 3)</b> | <b>%RSD</b> | <b>High<br/>Concentration<br/>(%R, n = 3 x 3)</b> | <b>%RSD</b> |
|-----------------------------------|--------------------------------------------------|-------------|-----------------------------------------------------|-------------|---------------------------------------------------|-------------|
| $\alpha$ -tocopherol              | 93.3                                             | 6.3         | 95.5                                                | 7.9         | 95.7                                              | 6.4         |
| ( $\beta$ + $\gamma$ )-tocopherol | 95.5                                             | 8.7         | 96.2                                                | 8.1         | 96.1                                              | 7.2         |
| $\delta$ -tocopherol              | 95.8                                             | 5.5         | 96.6                                                | 6.9         | 96.4                                              | 5.1         |

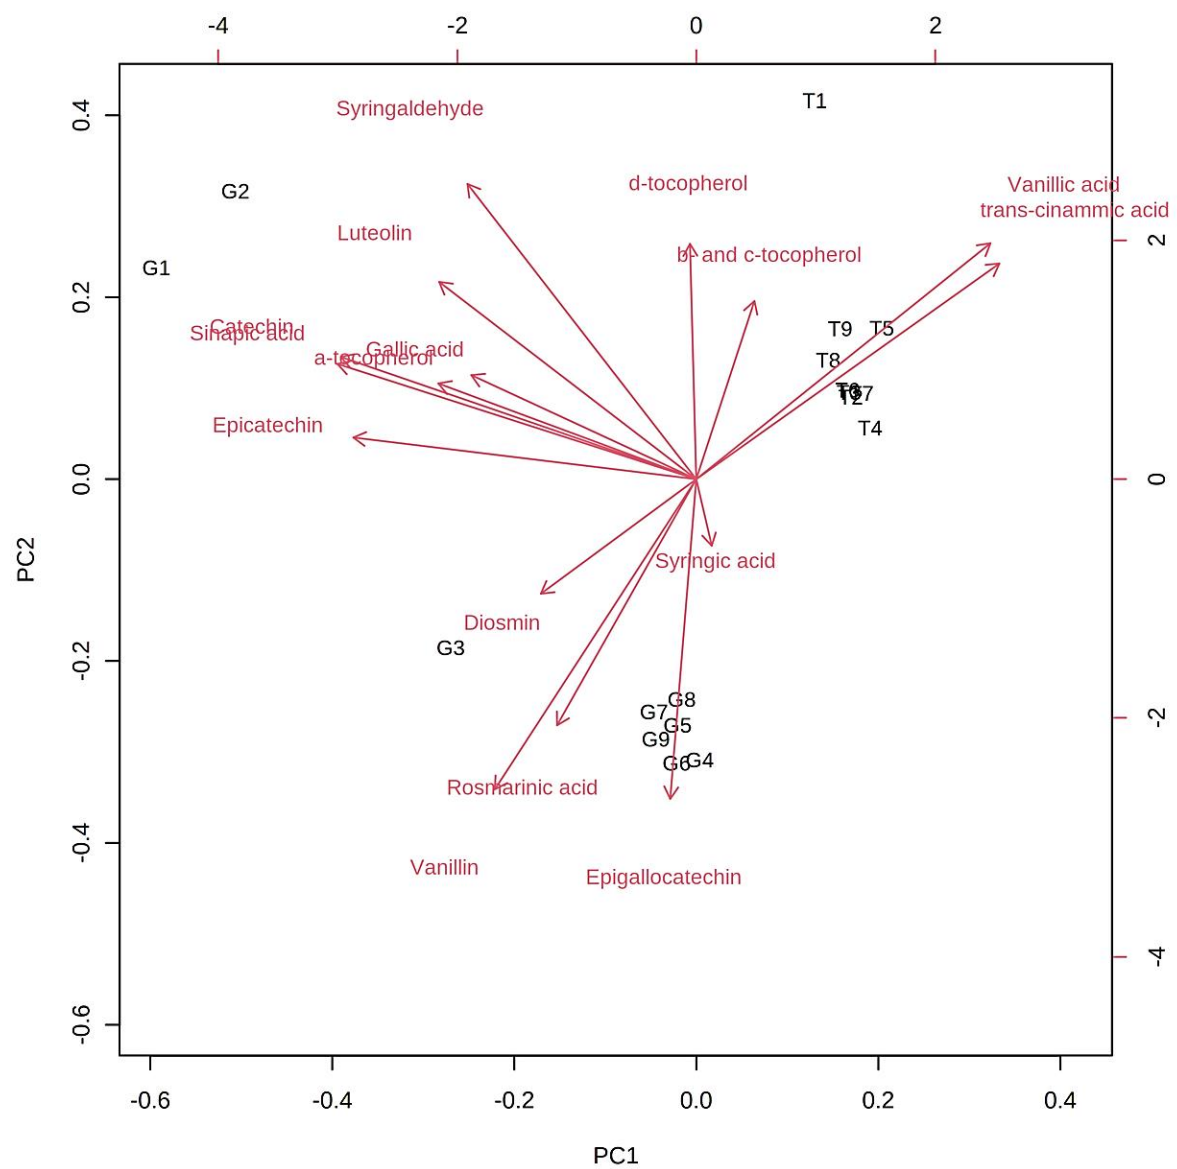

**Figure S1.** PCA biplot
